# Supplementary material for: The Wsc1p Cell Wall Signaling Protein Controls Biofilm (Mat) Formation Independently of Flo11p in Saccharomyces cerevisiae
Source: PubMed Central journal article supplement (PMC3931555; doi:10.1534/g3.113.006361), 2013-12-06
Supplement: supp_g3.113.006361_FigureS2.pdf [file supp_g3.113.006361_FigureS2.pdf]

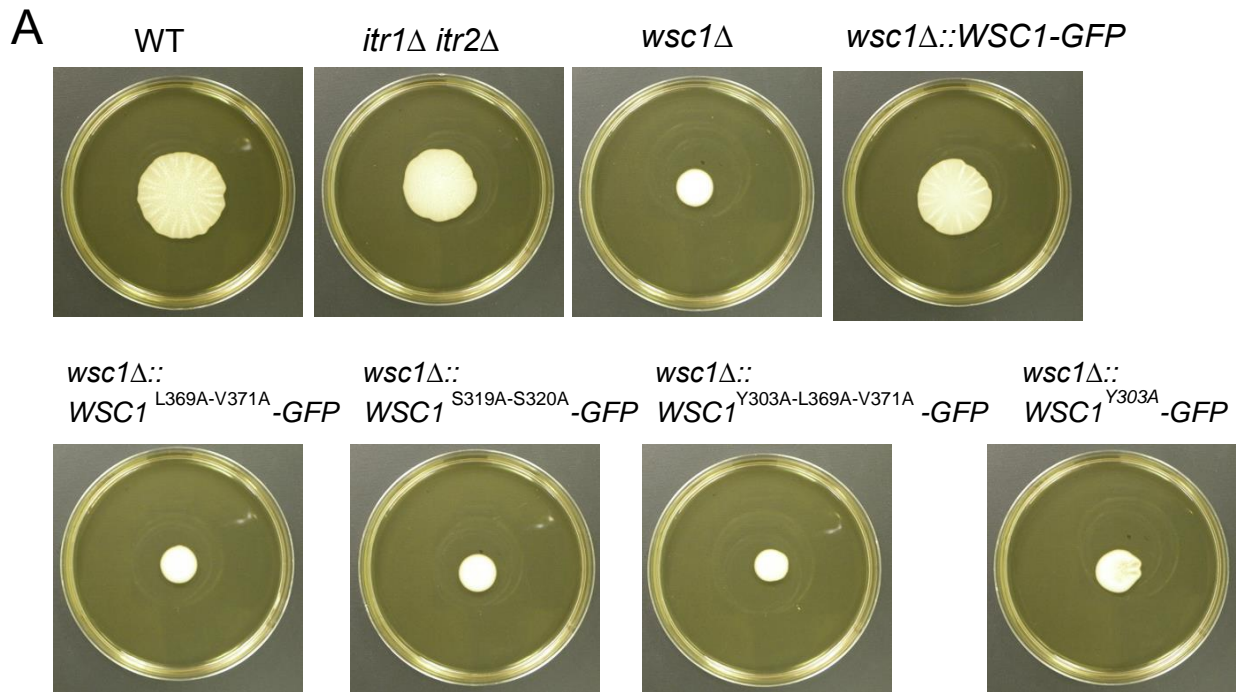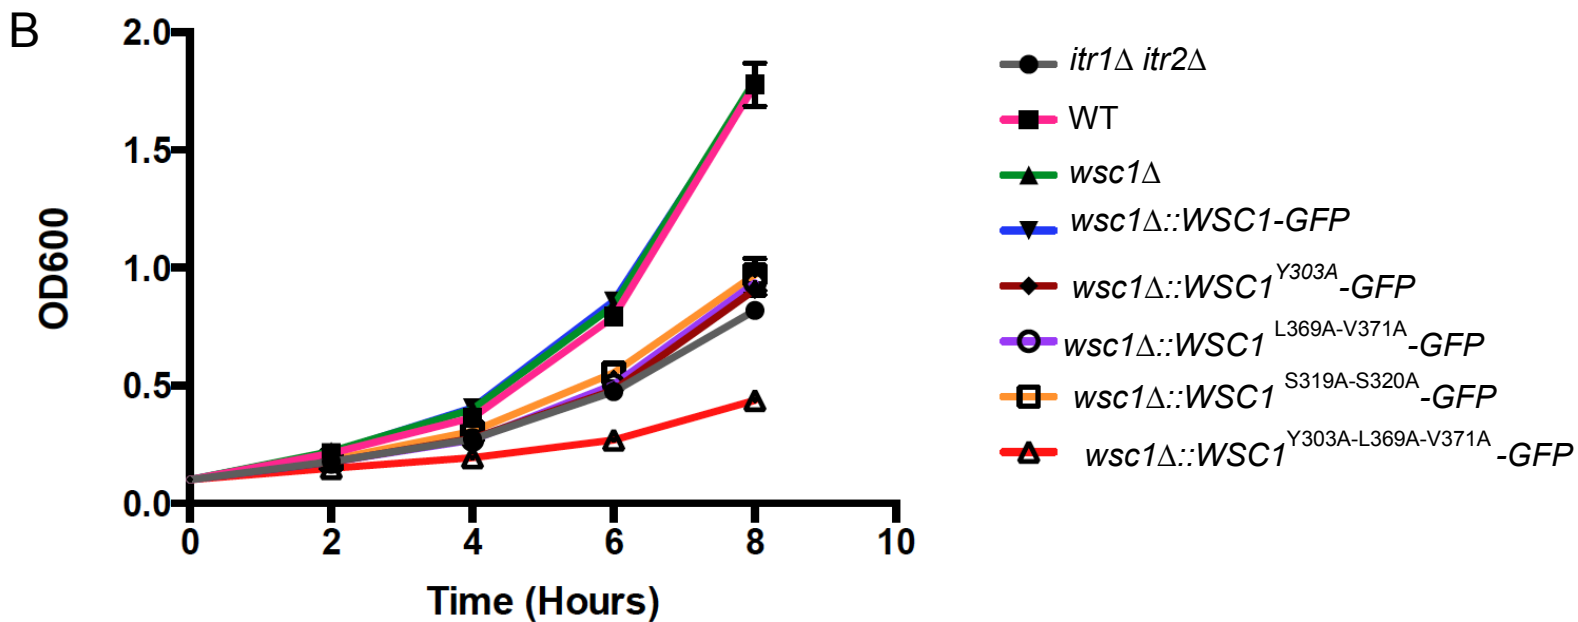

**Figure S2** The growth rates of the *WSC1*-GFP strains do not impact mat formation. (A) Wild-type (WT) and *itr1*Δ *itr2*Δ mutants, that exhibit differing growth rates were compared for mat formation along with the *wsc1*Δ mutant and various *WSC1* point mutants. (B) The growth rate of the strains was compared in liquid media.
