# Supplementary material for: The Wsc1p Cell Wall Signaling Protein Controls Biofilm (Mat) Formation Independently of Flo11p in Saccharomyces cerevisiae
Source: PubMed Central journal article supplement (PMC3931555; doi:10.1534/g3.113.006361), 2013-12-06
Supplement: supp_g3.113.006361_FigureS3.pdf [file supp_g3.113.006361_FigureS3.pdf]

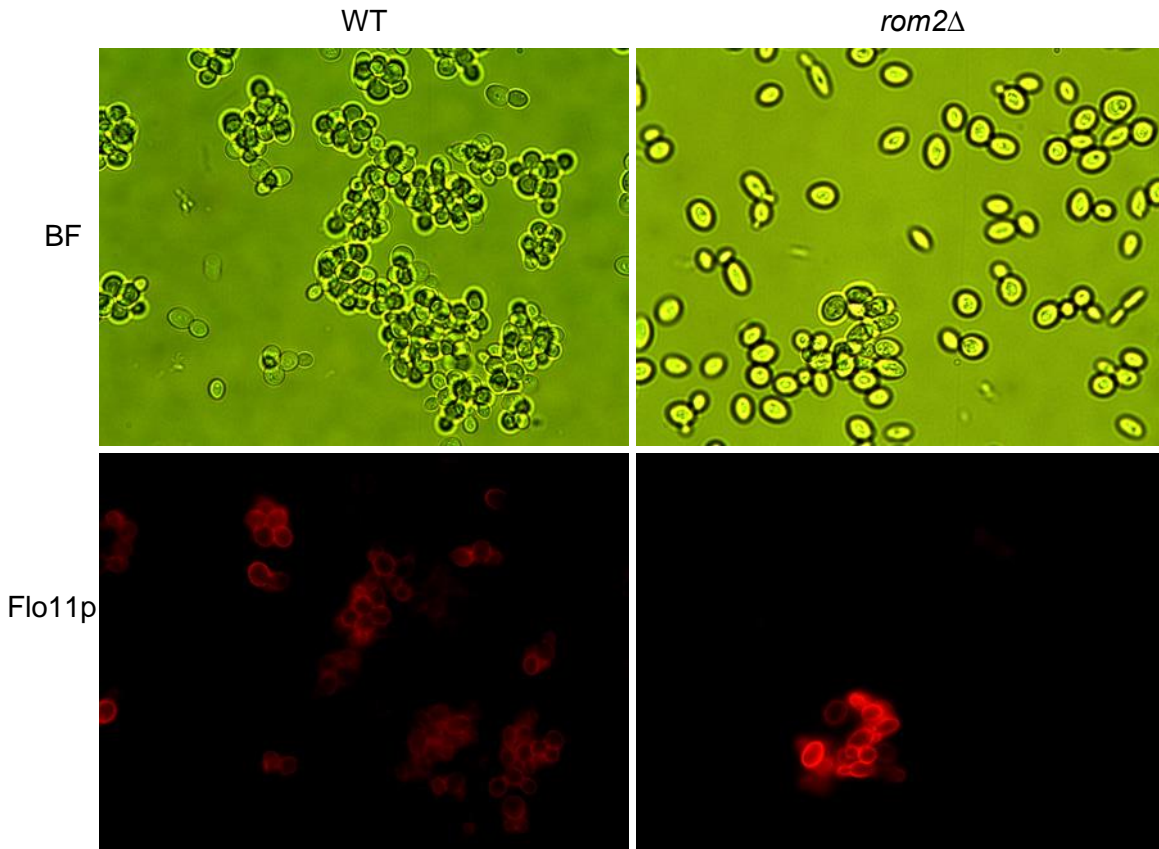

**Figure S3** The *rom2Δ* mutant has fewer aggregated cells than the wild-type, and most of these cells do not express Flo11p. Cells from WT and *rom2Δ* were compared by immunofluorescent microscopy with an anti-HA antibody.
