# Supplementary material for: The Wsc1p Cell Wall Signaling Protein Controls Biofilm (Mat) Formation Independently of Flo11p in Saccharomyces cerevisiae
Source: PubMed Central journal article supplement (PMC3931555; doi:10.1534/g3.113.006361), 2013-12-06
Supplement: supp_g3.113.006361_FigureS4.pdf [file supp_g3.113.006361_FigureS4.pdf]

**A**

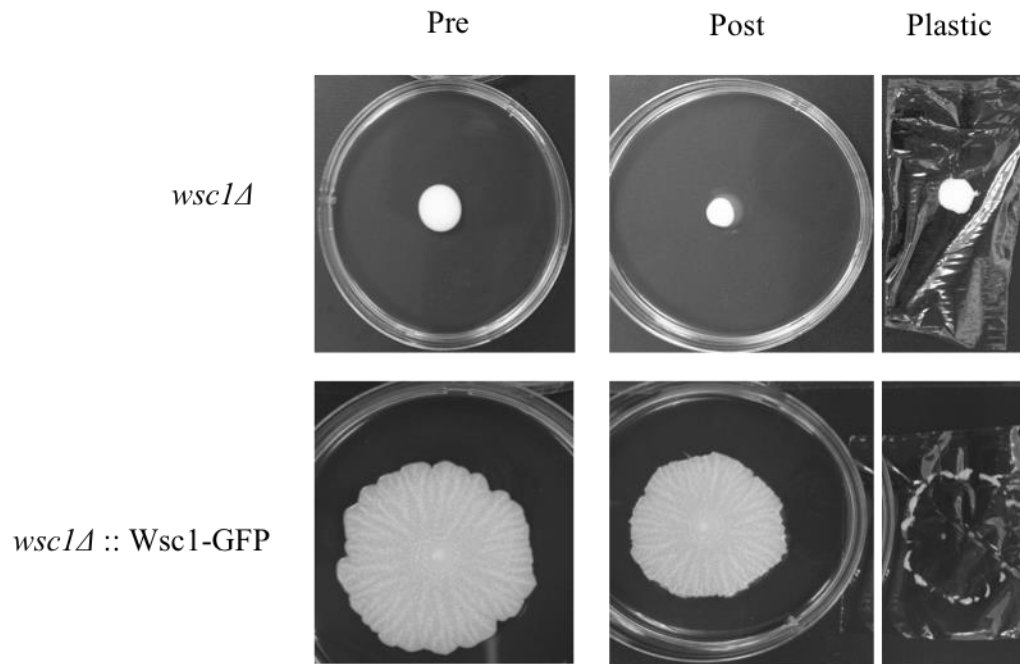

**B**

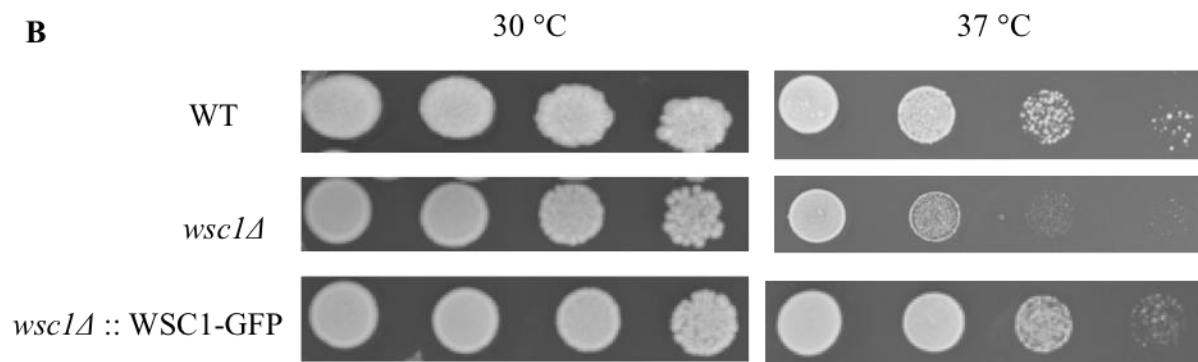

**Figure S4** WSC1-GFP construct rescues mat formation defect and temperature sensitivity phenotypes of *wsc1Δ*. (A) The mat formation phenotype and behavior in the overlay adhesion assay was assessed for the wild-type, *wsc1Δ*, and *wsc1Δ::WSC1-GFP* strains. (B) Growth of the strains was assessed after 48hrs at 37°C.
